# Supplementary material
Source: PubMed Central journal article supplement (PMC5572662)
Supplement: NIHMS889378-supplement-Supporting_Information.pdf [file NIHMS889378-supplement-Supporting_Information.pdf]

## Supporting Information

Structure and abbreviations of unusual amino acids and residues

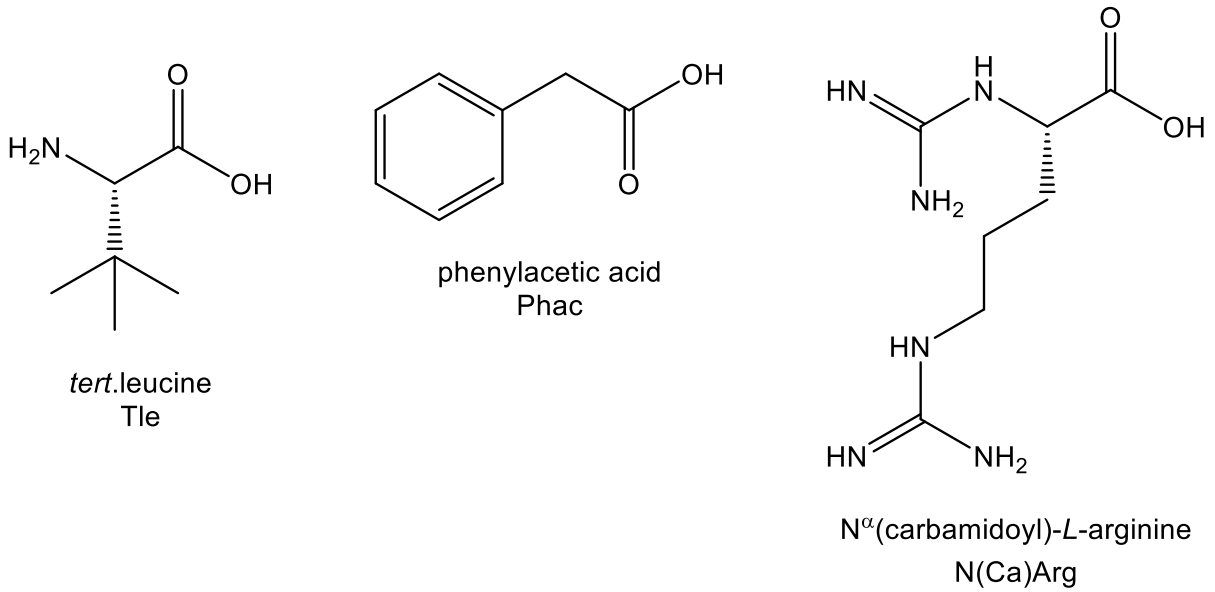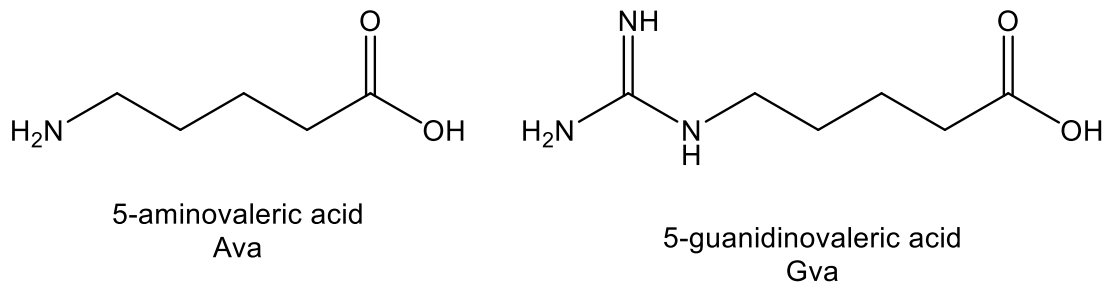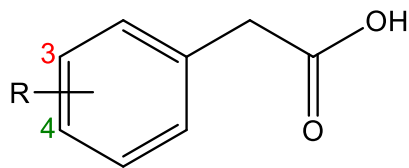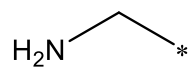

3/4-Aminomethyl-phenylacetic acid  
3/4-AMe-Phac

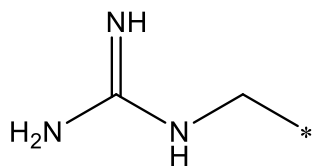

3/4-Guanidinomethyl-phenylacetic acid  
3/4-GMe-Phac
